# Supplementary material for: A Functional Outcome Prediction Model of Acute Traumatic Spinal Cord Injury Based on Extreme Gradient Boost
Source: Research Square preprint supplement (doi:10.21203/rs.3.rs-905273/v1), 2021-09-28
Supplement: Supplementary file 1 [file e433f9f370bb1f7807244164.docx]

| Age | 47.10±11.39 |
| --- | --- |
| Sex | Male = 35; Female = 13 |
| Level of injury | Cervical = 38; Thoracic = 10 |
| AIS at admission | A = 14; B = 6; C = 16; D = 12 |
| Baseline AMS | 55.58±27.57 |
| BASIC score | Score 1 = 13; Score 2 = 20; Score 3 = 7; Score 4 = 8 |
| Time to operation | Early surgery = 22; Delayed surgery = 26 |
| SCIM score | 76.29±26.66 |
